# Supplementary material
Source: PubMed Central journal article supplement (PMC3582744)
Supplement: NIHMS420708-supplement-10456_2012_9322_MOESM3_ESM.pdf [file NIHMS420708-supplement-10456_2012_9322_MOESM3_ESM.pdf]

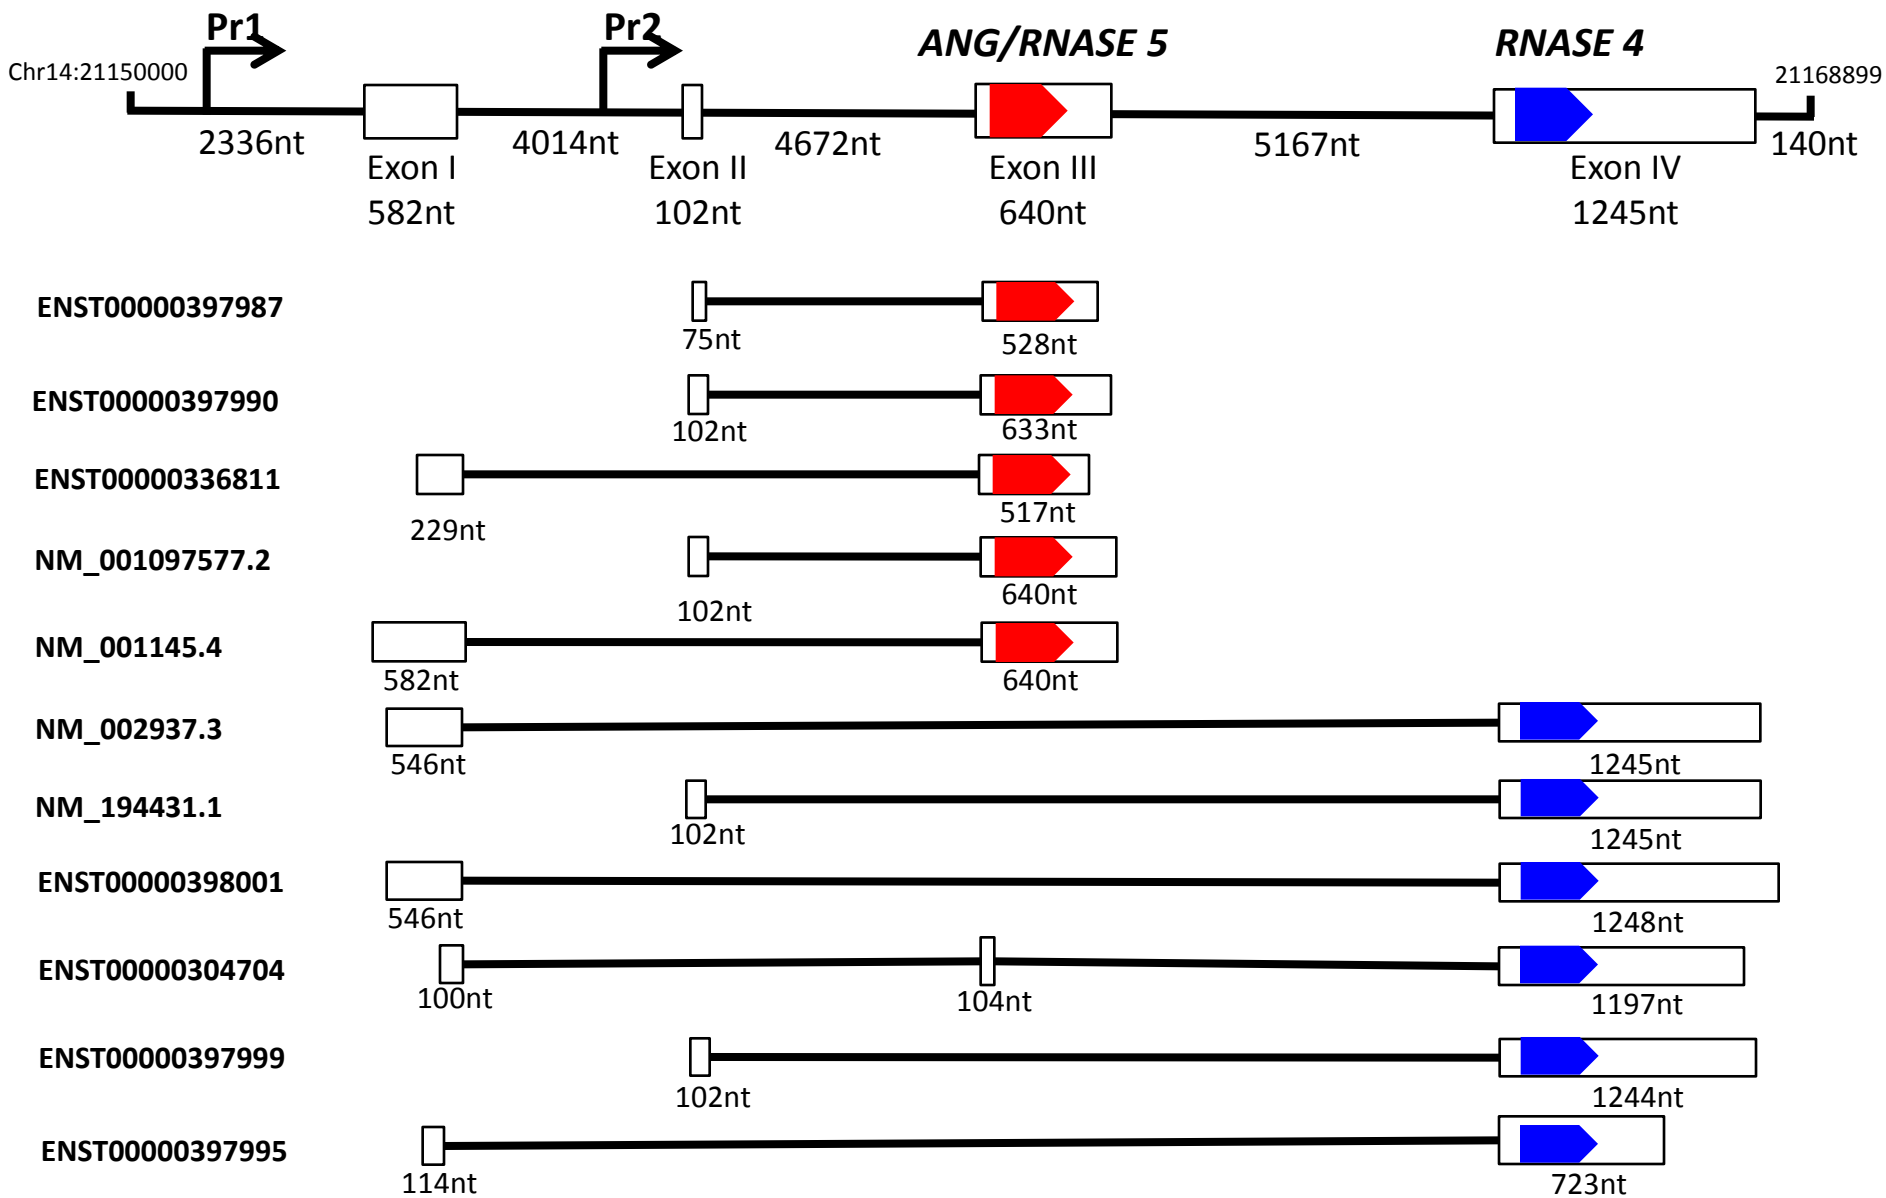

**Figure S3.** Transcripts of ANG and RNASE4 found in database. NM\_XXX, NCBI Genebank database, ENSTXXX, Ensembl project database.
