# Supplementary material
Source: PubMed Central journal article supplement (PMC3582744)
Supplement: NIHMS420708-supplement-10456_2012_9322_MOESM4_ESM.pdf [file NIHMS420708-supplement-10456_2012_9322_MOESM4_ESM.pdf]

-84 ATG GCT CTG CAG AGG ACC CAT TCA TTG CTT CTG CTT TTG CTG CTG **A(T)**CC CTG CTG GGG CTG  
GGG CTG GTC CAG CCC TCC TAT GGC -1  
1 CAG GAT GGC ATG TAC CAG CGA TTC CTG **C(T)**GG CAA CAC GTG CAC CCT GAG GAG ACA GGT GGC AGT  
GAT CGC TAC TGC AAC TTG ATG ATG CAA AGA CGG AAG ATG ACT TTG TAT CAC TGC AAG CGC TTC AAC  
ACC TTC ATC CAT **GAA(C)** GAT ATC TGG AAC ATT CGT AGT ATC TGC AGC ACC ACC AAT ATC CAA TGC  
AAG AAC GGC AAG ATG AAC TGC CAT **GAG(A)** GGT **G(A)**TA GTG AAG GTC ACA GAT TGC AGG GAC ACA  
GGA AGT TCC AGG GCA CCC AAC TGC AGA TAT CGG GCC ATA **GC(T)**G AGC ACT AGA CGT GTT GTC ATT  
GCC TGT GAG GGT AAC CCA CAG GTG CCT GTG CAC TTT GAC GGT TAG 1007

**Figure S4.** Nucleotide sequence of RNASE4. The first nucleotide in the codon encoding the first amino acid in the mature protein is numbered 1. The numbering in the signal peptide region starts at the last nucleotide of the codon encoding the last amino acid of the signal peptide and goes backward upstream. The nucleotide changes identified from this study were given in parentheses and were indicated in red
