# Supplementary material
Source: PubMed Central journal article supplement (PMC3582744)
Supplement: NIHMS420708-supplement-10456_2012_9322_MOESM5_ESM.pdf [file NIHMS420708-supplement-10456_2012_9322_MOESM5_ESM.pdf]

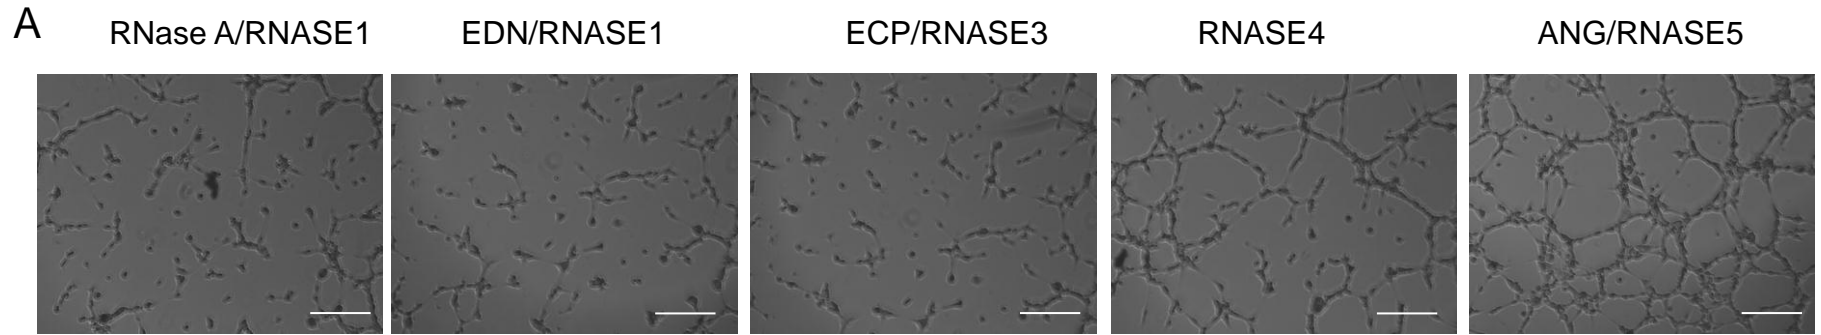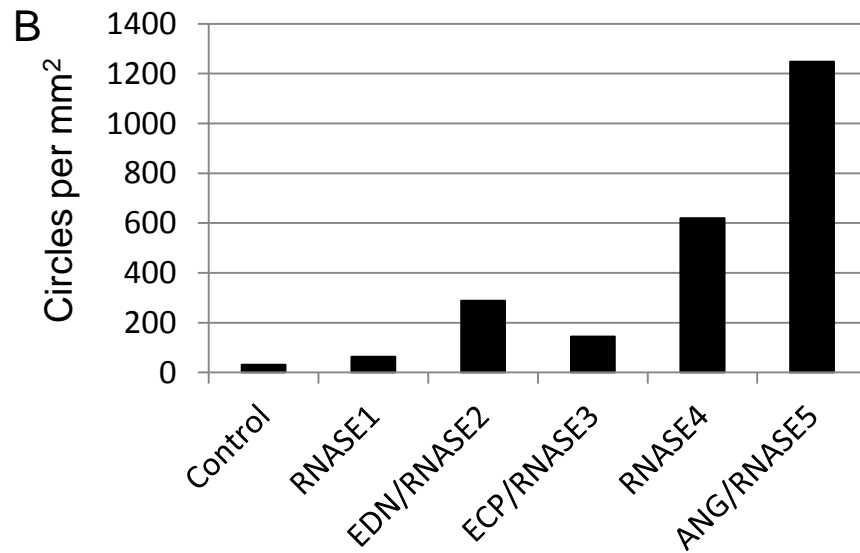

**Figure S5.** Angiogenic activities of ribonucleases. **(A)** Microscopic images of endothelial cell tubes formed in the presence of 1  $\mu\text{g}/\text{ml}$  different ribonucleases. Bar, 0.1 mm. **(B)** Number of circled tubular structures per mm<sup>2</sup>.
