# Supplementary material
Source: PubMed Central journal article supplement (PMC3582744)
Supplement: NIHMS420708-supplement-10456_2012_9322_MOESM6_ESM.pdf [file NIHMS420708-supplement-10456_2012_9322_MOESM6_ESM.pdf]

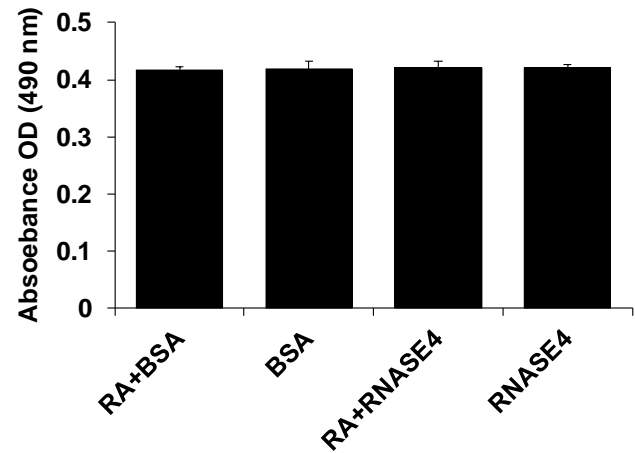

**Figure S6.** RNASE4 has no effect on PA6 cell proliferation. PA6 cells were cultured in  $\alpha$ -MEM containing 0.1% NEAA and 0.1% NKSR in the presence of 0.2  $\mu\text{g}/\text{ml}$  BSA or RNASE4 with or without 0.5  $\mu\text{M}$  retinoic acid. Cell proliferation was determined by MTT assay.
