# Supplementary material
Source: PubMed Central journal article supplement (PMC3582744)
Supplement: NIHMS420708-supplement-10456_2012_9322_MOESM7_ESM.pdf [file NIHMS420708-supplement-10456_2012_9322_MOESM7_ESM.pdf]

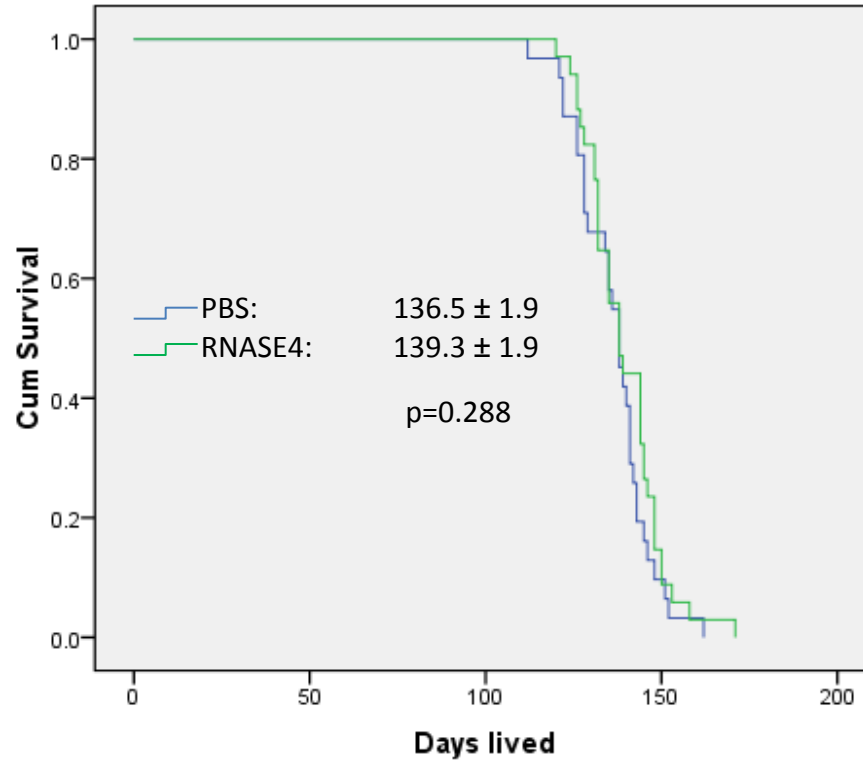

**Figure S7.** Effect of i.p.-injection of RNASE4 protein on survival of *SOD1<sup>G93A</sup>* mice. Starting from 11 weeks of age, mice were treated with weekly i.p. injection of WT RNASE4 protein at 10  $\mu$ g per mouse. A total of 34 and 31 mice were used in the RNASE4 treatment and PBS control group, respectively. Survival benefit was analyzed by Kaplan-Meier method.
